# Supplementary material
Source: PubMed Central journal article supplement (PMC4531352)
Supplement: supp_tpc.15.00208_TPC2015-00208-LSBR3_Supplemental_Data.pdf [file supp_tpc.15.00208_TPC2015-00208-LSBR3_Supplemental_Data.pdf]

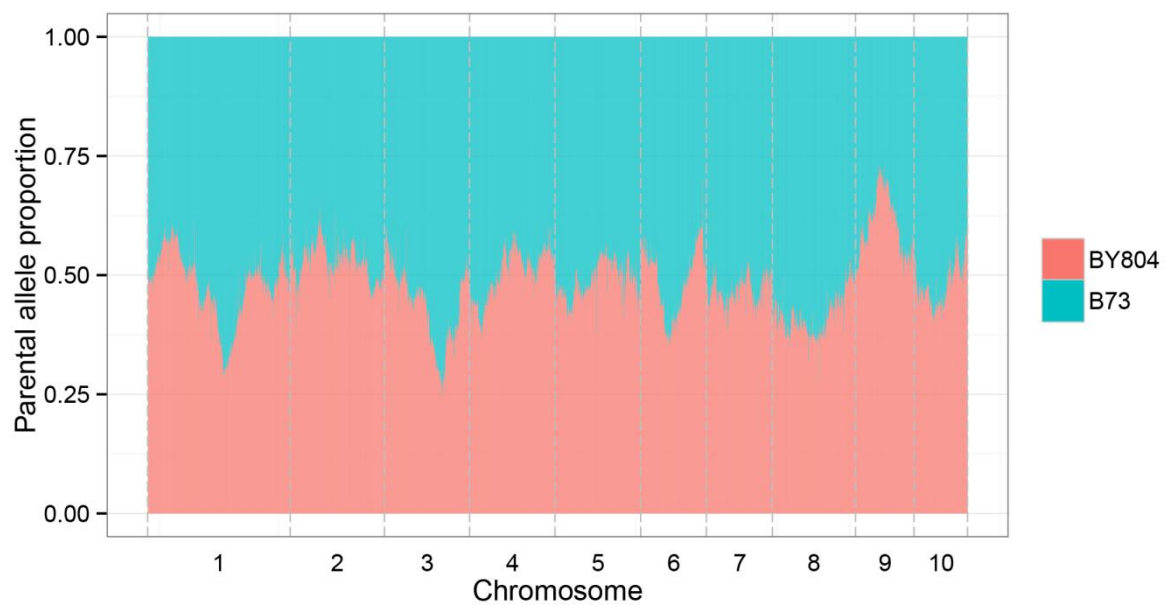

**Supplemental Figure 1:** Allele distribution within the B73/By804 RIL population (Allele type of each bin for each line within the B73/By804 RIL population). Blue indicates the proportion of lines with a B73 allele and the red indicate the proportion of lines with a By804 allele.



C.

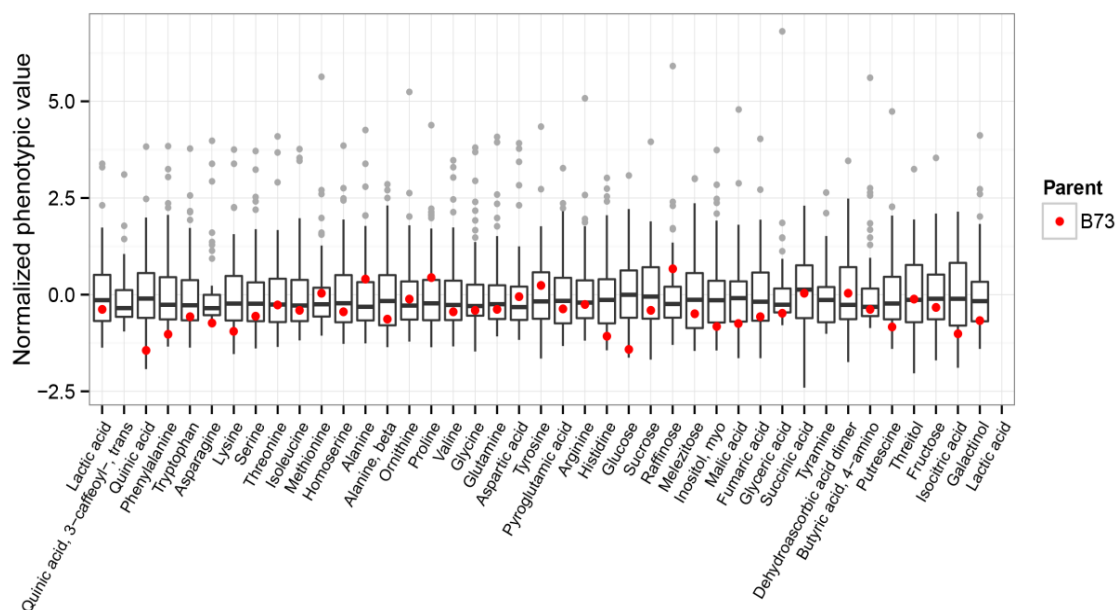

**Supplemental Figure 2:** Distribution of metabolite level in the B73/By804 recombinant line population. **(A)** Metabolites detected in the seedling leaf of each line. **(B)** Metabolites detected in the leaf at reproductive stage of each line. **(C)** Metabolites detected in the kernel at 15 days after pollination of each line.

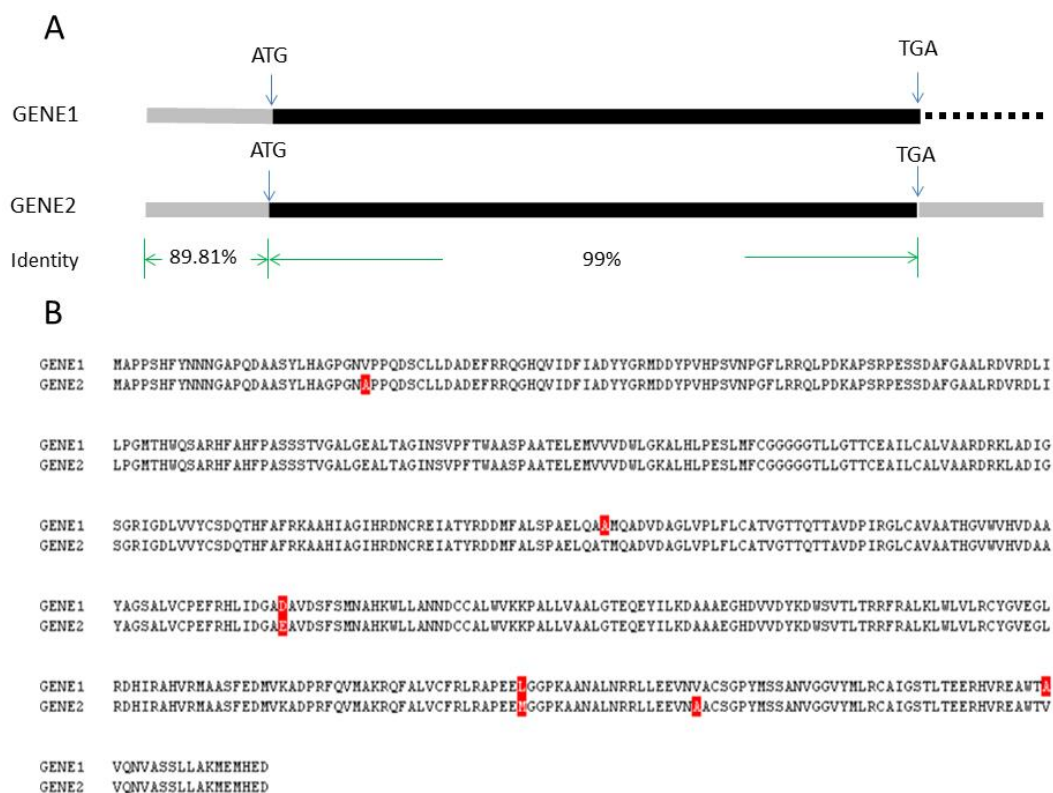

**Supplemental Figure 3:** Sequence differences between two TDC genes in B73. **(A)** Schematic of the transcriptional sequence of the two genes. Dashed line represents deletion; the segmental nucleotide sequence identity between the two genes is indicated. **(B)** Amino acid sequence of the two genes. Amino acids that are different between the two genes are marked in red. GENE1 (*TDC1*): GRMZM2G056469; GENE2 (*TDC2*): GRMZM2G093125.

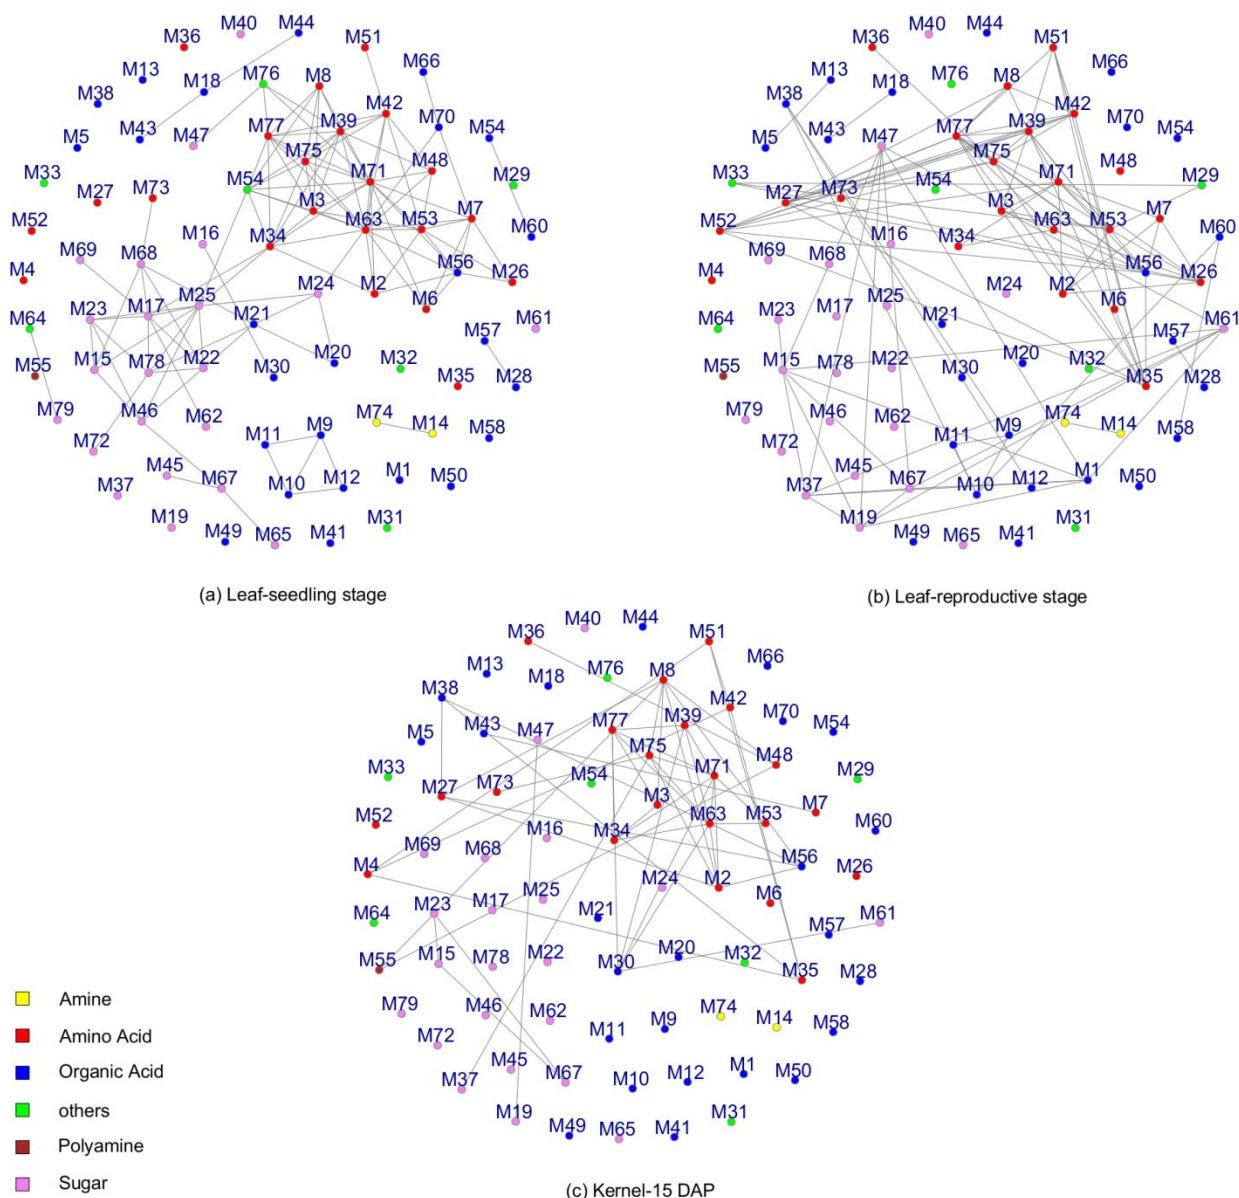

**Supplemental Figure 4:** Metabolite relevance networks. Metabolite relevance networks were inferred for (a) leaf at seedling stage, (b) leaf at reproductive stage, and (c) kernel. The red and blue edges imply positive and negative correlation coefficients, respectively. The color of the nodes represents the metabolite classes. M1: M1: cis -Aconitic acid; M2: Alanine; M3: beta-Alanine.; M4: Arginine; M5: Ascorbic acid; M6: Asparagine; M7: Aspartic acid; M8: GABA; M9: Caffeic acid, cis; M10: Caffeic acid, trans; M11: Cinnamic acid-4-hydroxy, trans; M12: Citric acid; M13: Dehydroascorbic acid; M14: Dopamine; M15: Fructose; M16: Fructose-6-phosphate; M17: Fucose; M18: Fumaric acid; M19: Galactinol; M20: Galactonic acid; M21: Galactonic acid-1,4-lactone; M22: Glucoheptose; M23: Glucose; M24: Glucose-1,6-anhydro-beta; M25: Glucosone-3-deoxy; M26: Glutamic acid; M27: Glutamine; M28: 2-oxo-Glutaric acid; M29: Glyceraldehyde-3-phosphate; M30: Glyceric acid; M31: Glyceric acid-3-phosphate; M32: Glycerol; M33: Glycerol-3-phosphate; M34: Glycine; M35: Histidine; M36: Homoserine; M37: Inositol-myo; M38: Isocitric acid; M39: Isoleucine; M40: Isomaltose; M41: Lactic acid; M42: Lysine; M43: Malic acid; M44: Malic acid-2-methyl; M45: Maltose; M46: Mannose; M47: Melezitose; M48: Methionine; M49: Mucic acid; M50: Nicotinic acid; M51: Ornithine; M52: Phenylalanine; M53: Proline; M54: Proline-4-hydroxy-DL, trans; M55: Putrescine; M56: Pyroglutamic acid; M57: Pyruvic acid; M58: Quinic acid; M59: Quinic acid-3-caffeoyl, cis; M60: Quinic acid-3-caffeoyl, trans; M61: Raffinose; M62: Rhamnose; M63: Serine; M64: Serine-N-acetyl; M65: Squalene-all-trans; M66: Succinic acid; M67: Sucrose; M68: Tagatose; M69: Threitol; M70: Threonic acid; M71: Threonine; M72: Trehalose; M73: Tryptophan; M74: Tyramine; M75: Tyrosine; M76: Urea; M77: Valine; M78: Xylose; M79: Xylulose.

**Supplemental Table 1.** Epistatic interactions between QTLs.

| Tissue <sup>a</sup> | Metabolite           | QTL_ID <sup>b</sup> | QTL_ID | P value  | R <sup>2</sup> (%) <sup>c</sup> |
|---------------------|----------------------|---------------------|--------|----------|---------------------------------|
| leaf1               | Threitol             | 1                   | 2      | 0.044763 | 2.51                            |
| leaf1               | Valine               | 2                   | 4      | 0.005097 |                                 |
| leaf1               | Valine               | 3                   | 4      | 0.043317 | 3.19                            |
| leaf1               | Fructose             | 3                   | 4      | 0.010592 | 2.74                            |
| leaf1               | Inositol, myo        | 1                   | 2      | 0.042376 | 2.57                            |
| leaf1               | Rhamnose             | 1                   | 2      | 0.00796  | 5.87                            |
| leaf1               | Nicotinic acid       | 1                   | 2      | 0.008464 |                                 |
| leaf1               | Nicotinic acid       | 2                   | 3      | 0.000454 | 15.25                           |
| leaf1               | Ascorbic acid        | 1                   | 3      | 0.047734 | 2.62                            |
| leaf1               | Serine, N-acetyl     | 1                   | 2      | 0.007076 | 4.48                            |
| leaf1               | Putrescine           | 1                   | 2      | 0.019926 | 4.24                            |
| leaf1               | Glutaric acid, 2-oxo | 1                   | 2      | 0.002605 | 4.97                            |
| leaf1               | Glucoheptose         | 2                   | 4      | 0.025112 | 2.57                            |
| leaf2               | Malic acid           | 2                   | 4      | 0.008263 |                                 |
| leaf2               | Malic acid           | 3                   | 5      | 0.048498 |                                 |
| leaf2               | Malic acid           | 5                   | 6      | 0.004012 | 5.93                            |
| leaf2               | Fructose             | 1                   | 2      | 0.006004 | 5.77                            |
| leaf2               | Caffeic acid, trans  | 1                   | 2      | 0.015032 | 3.85                            |
| leaf2               | Trehalose            | 1                   | 2      | 0.049081 |                                 |
| leaf2               | Trehalose            | 1                   | 3      | 0.035524 |                                 |
| leaf2               | Trehalose            | 1                   | 4      | 0.011117 |                                 |
| leaf2               | Trehalose            | 4                   | 6      | 0.044393 |                                 |
| leaf2               | Trehalose            | 5                   | 6      | 0.034599 | 8.95                            |
| leaf2               | Asparagine           | 1                   | 2      | 0.007786 | 5.21                            |
| leaf2               | Isocitric acid       | 2                   | 3      | 0.008135 | 6.66                            |
| leaf2               | Citric acid          | 1                   | 2      | 0.044902 | 1.73                            |
| leaf2               | Dehydroascorbic acid | 1                   | 2      | 0.030411 | 4.87                            |
| kernel              | Homoserine           | 1                   | 3      | 0.025924 | 4.77                            |
| kernel              | Ornithine            | 2                   | 5      | 0.014801 | 9.54                            |
| kernel              | Proline              | 1                   | 3      | 0.01152  | 11.97                           |
| kernel              | Aspartic acid        | 1                   | 2      | 0.001607 |                                 |
| kernel              | Aspartic acid        | 2                   | 3      | 0.022122 |                                 |
| kernel              | Aspartic acid        | 2                   | 4      | 0.049254 | 11.71                           |
| kernel              | Arginine             | 1                   | 2      | 0.025086 | 10.67                           |
| kernel              | Isocitric acid       | 1                   | 2      | 0.0043   | 12.44                           |
| kernel              | Galactinol           | 1                   | 2      | 0.006988 |                                 |
| kernel              | Galactinol           | 1                   | 3      | 0.005174 | 16.64                           |

a) leaf1: leaf at seedling stage; leaf2: leaf at reproductive stage.

b) QTL\_ID corresponds to the order of QTL listed in Supplemental Dataset 3.

c) the subtotal of variance explained by epistatic interactions of each metabolic trait PVE: percentage that explains the phenotypic variation.

**Supplemental Table 2.** Primers used for re-sequencing *AGT* in B73 and By804 and PCR-based InDel detection.

| Primers                                  | Forward               | Reverse               |
|------------------------------------------|-----------------------|-----------------------|
| P1                                       | TGCTGCACATCCCTTGGATAG | GAGTGGAGAGTCGTTTCGTGG |
| P2                                       | ACGTGCATTTTTCTGGACGC  | AGGGTATACCGGCTTCTGGT  |
| P3                                       | CGATGCCCGGTGGAGATG    | ACTGCAGCAAACATGTGACT  |
| P4                                       | GTCTGTCTGGGTGCAGTCAT  | AATTCCTGAAACCAGGGGG   |
| P5                                       | ACTGGCAGTCATTACTGGGG  | ACACCACCAACATAACCACCC |
| P6                                       | ATTGCGCGCACAAACTAACAA | GGTAGAGGGAACAGGGCATC  |
| Primers for PCR-based<br>InDel detection | CACTCCCACCAGATAGCCAC  | GGACAACCAGGAGCGGAATA  |

**Supplemental Table 3.** Sequence polymorphisms between B73 and By804 in the candidate gene *AGT* identified by re-sequencing.

| Site at <i>AGT</i> <sup>a</sup> | Physical Position (bp) <sup>b</sup> | B73/By804 <sup>c</sup> |
|---------------------------------|-------------------------------------|------------------------|
| -264                            | 15352982                            | A/C                    |
| -8                              | 15353238                            | A/C                    |
| 171                             | 15353417                            | -/43bp-Insertion       |
| 275                             | 15353521                            | C/T*                   |
| 331                             | 15353577                            | C/T*                   |
| 401                             | 15353647                            | T/C*                   |
| 444                             | 15353690                            | T/C*                   |
| 458                             | 15353704                            | A/G*                   |
| 661                             | 15353907                            | T/G*                   |
| 694                             | 15353940                            | G/A*                   |
| 721                             | 15353967                            | T/A*                   |
| 760                             | 15354006                            | G/T                    |
| 764                             | 15354010                            | A/G                    |
| 772                             | 15354018                            | G/A                    |
| 2077                            | 15355323                            | -/T-Insertion          |
| 2424                            | 15355670                            | C/T                    |
| 2539                            | 15355785                            | A/G*                   |
| 2814                            | 15356060                            | -/A-Insertion          |
| 3046                            | 15356292                            | TGG-Insertion/-        |
| 3130                            | 15356376                            | G/A*                   |
| 3131                            | 15356377                            | T/C*                   |
| 3165                            | 15356411                            | C/T*                   |
| 3173                            | 15356419                            | G/A                    |
| 3201                            | 15356447                            | G/T*                   |
| 3202                            | 15356448                            | T/C*                   |
| 3218                            | 15356464                            | C/G*                   |
| 3232                            | 15356478                            | A/C                    |
| 3250                            | 15356496                            | A/C                    |
| 3256                            | 15356502                            | -/GGA-Insertion        |
| 3295                            | 15356541                            | -/GTG-Insertion        |
| 3296                            | 15356542                            | -/GT-Insertion         |
| 3314                            | 15356560                            | A/G                    |
| 3329                            | 15356575                            | -/TG-Insertion         |
| 3331                            | 15356577                            | T/C                    |
| 3337                            | 15356583                            | -/CC-Insertion         |
| 3340                            | 15356586                            | A/C                    |
| 3343                            | 15356589                            | C/T                    |
| 3358                            | 15356604                            | T/C                    |
| 3392                            | 15356638                            | A/T                    |

a) The location of each polymorphic site in *AGT*

b) The physical position of each polymorphic site in the maize genome

c) Alleles from B73 and By804 at each polymorphic site

“\*” represents genomic variants that were also identified by RNA-sequencing



**Supplemental Table 4.** Sequence polymorphisms between B73 and By804 in the candidate gene *TDC1* identified by re-sequencing.

| Site at <i>TDC1</i> <sup>a</sup> | Physical Position (bp) <sup>b</sup> | B73/By804 <sup>c</sup> | Amino Acid replacement |
|----------------------------------|-------------------------------------|------------------------|------------------------|
| -475                             | 17831437                            | G-                     |                        |
| -385                             | 17831347                            | A/G                    |                        |
| -315                             | 17831277                            | G/T                    |                        |
| -270                             | 17831232                            | G/A                    |                        |
| -260                             | 17831222                            | T/C                    |                        |
| -217                             | 17831179                            | CTTC+                  |                        |
| -213                             | 17831175                            | ATGCATG+               |                        |
| -151                             | 17831113                            | T/C                    |                        |
| -140                             | 17831102                            | C/G                    |                        |
| -131                             | 17831093                            | C/T                    |                        |
| -13                              | 17830975                            | C/A                    |                        |
| -4                               | 17830966                            | TCTC-                  |                        |
| 34                               | 17830930                            | G/A                    |                        |
| 82                               | 17830882                            | A/T                    |                        |
| 191                              | 17830773                            | T/C                    | Val/Ala                |
| 243                              | 17830721                            | C/T                    |                        |
| 339                              | 17830625                            | T/C                    |                        |
| 344                              | 17830620                            | A/C                    | Asp/Ala                |
| 348                              | 17830616                            | G/T                    | Lys/Asp                |
| 729                              | 17830235                            | G/A                    |                        |
| 966                              | 17829998                            | G/T                    |                        |
| 1029                             | 17829935                            | C/T                    |                        |
| 1066                             | 17829898                            | T/C                    |                        |
| 1146                             | 17829818                            | T/G                    |                        |
| 1368                             | 17829596                            | G/T                    |                        |
| 1483                             | 17829481                            | G/A                    | Ala/Thr                |
| 1523                             | 17829441                            | T/C                    | Val/Ala                |
| 1536                             | 17829428                            | G/A                    |                        |
| 1617                             | 17829347                            | T/C                    |                        |
| 1623                             | 17829341                            | T/C                    |                        |
| 1629                             | 17829335                            | A/T                    |                        |
| 1637                             | 17829327                            | C/T                    | Ala/Val                |
| 1660                             | 17829304                            | C/A                    | Leu/Ile                |

a) The location of each polymorphic site in *TDC1*

b) The physical position of each polymorphic site in the maize genome

c) Alleles from B73 and By804 at each polymorphic site

**Supplemental Table 5.** Sequence polymorphisms between B73 and By804 in the candidate gene *TDC2* identified by re-sequencing.

| Site at <i>TDC2</i> <sup>a</sup> | Physical Position (bp) <sup>b</sup> | B73/By804 <sup>c</sup> | Amino Acid replacement |
|----------------------------------|-------------------------------------|------------------------|------------------------|
| -489                             | 17855175                            | T/G                    |                        |
| -478                             | 17855186                            | C/83bp-Insertion       |                        |
| -472                             | 17855192                            | G/A                    |                        |
| -427                             | 17855237                            | -/CATG-Insertion       |                        |
| -384                             | 17855280                            | -/A-Insertion          |                        |
| -294                             | 17855370                            | TAA-                   |                        |
| -263                             | 17855401                            | A/T                    |                        |
| -252                             | 17855412                            | A/C                    |                        |
| -196                             | 17855468                            | G/C                    |                        |
| -145                             | 17855519                            | CAC/-                  |                        |
| -135                             | 17855529                            | T/A                    |                        |
| 25                               | 17855689                            | C/T                    |                        |
| 62                               | 17855726                            | G/TCTCT                |                        |
| 65                               | 17855729                            | AA/CGC                 |                        |
| 72                               | 17855736                            | G/C                    |                        |
| 76                               | 17855740                            | G/T                    |                        |
| 80                               | 17855744                            | CG/-                   |                        |
| 91                               | 17855755                            | AA-                    |                        |
| 103                              | 17855767                            | AAAT/-                 |                        |
| 113                              | 17855777                            | -/C-Insertion          |                        |
| 115                              | 17855779                            | G/A                    |                        |
| 123                              | 17855787                            | TTCACC/-               |                        |
| 138                              | 17855802                            | A/T                    |                        |
| 161                              | 17855825                            | C/A                    |                        |
| 320                              | 17855984                            | C/T                    |                        |
| 398                              | 17856062                            | C/T                    |                        |
| 421                              | 17856085                            | A/C                    | Asp/Ala                |
| 425                              | 17856089                            | G/T                    | Lys/Asn                |
| 806                              | 17856470                            | G/A                    |                        |
| 957                              | 17856621                            | A/G                    | Thr/Ala                |
| 1022                             | 17856686                            | T/C                    |                        |
| 1069                             | 17856733                            | C/G                    | Ala/Gly                |
| 1094                             | 17856758                            | G/T                    |                        |
| 1106                             | 17856770                            | C/T                    |                        |
| 1160                             | 17856824                            | A/C                    | Glu/Asp                |
| 1223                             | 17856887                            | T/G                    |                        |
| 1445                             | 17857109                            | G/T                    |                        |
| 1448                             | 17857112                            | A/G                    |                        |
| 1542                             | 17857206                            | A/T                    | Met/Leu                |

|      |          |             |
|------|----------|-------------|
| 1575 | 17857239 | C/A         |
| 1586 | 17857250 | A/T         |
| 1637 | 17857301 | T/C         |
| 1749 | 17857413 | ATGGAGATG/- |
| 1764 | 17857428 | GATTAT/-    |
| 1891 | 17857555 | A/G         |

---

a) The location of each polymorphic site in *TDC2*

b) The physical position of each polymorphic site in the maize genome

c) Alleles from B73 and By804 at each polymorphic site

**Supplemental Table 6.** Primers used for re-sequencing *TDC1* and *TDC2* in B73 and By804 and PCR-based InDel detection.

| Gene                                  | Primers | Forward                    | Reverse                         |
|---------------------------------------|---------|----------------------------|---------------------------------|
| <i>TDC1</i>                           | P1      | AACCATCTTTCACCTCAGAAGGA    | TTCCGACCAGACGCACCTT             |
|                                       | P2      | CGGAACAGTAGACGACGAGG       | CGAGGCGGCTCGTATTTTTC            |
|                                       | P3      | GAGCCGCCTCGTAGCTATTT       | TAGAAAACGCGGCAGCCTAA            |
|                                       | P4      | GATTAGCCGCACCCCTTCTAC      | GCTCCTTTAGCCACATCGTGA           |
|                                       | P5      | ATGACATACGCAGTGGCGAA       | TTCTGGTGTGCTCTCTACGC            |
|                                       | P6      | CCAGTGTCAACCCTGGCTTC       | GGAACCTCTGGGCAGACGAG            |
| <i>TDC2</i>                           | P1      | GTGTAGTACGTGTACCCCTCG      | CGTAGTAGTCGGCGATGAAGT           |
|                                       | P2      | GGTACCATGGCCCCGCCATCACACTT | TCTAGATCAATAATCTTCATGCATCTCCATT |
|                                       | P3      | TCCAAGTCATGGCAAAGAGGC      | TCTTGAGTGTAGCTTGGGATGC          |
| Primers for PCR-based InDel Detection |         | TTGAAAAGCAGGCAGCCTAA       | ATCCTCGCCCTGTCAAGTTT            |

**Supplemental Table 7.** Summary of QTL intervals for seven agronomic traits.

| Trait                | Chromosome | Length of Confidence Interval (cM) | Physical Interval (bp) | LOD      | R <sup>2</sup> (%) |
|----------------------|------------|------------------------------------|------------------------|----------|--------------------|
| Plant height         | 8          | 3.6                                | 0-1454311              | 3.311315 | 6.8285             |
| Biomass              | 2          | 13.5                               | 229414096-234266187    | 3.615849 | 8.9016             |
| Biomass              | 7          | 10.9                               | 157504609-162259657    | 4.372863 | 11.0697            |
| Biomass              | 10         | 6.8                                | 138086034-141377442    | 5.5566   | 14.0128            |
| Ear height           | 4          | 10.1                               | 3140718-4686236        | 4.067802 | 8.5249             |
| Ear height           | 5          | 18.8                               | 27394919-31860788      | 3.34793  | 6.8949             |
| Length of ear leaf   | 1          | 4.4                                | 243021141-246472571    | 4.487848 | 8.5478             |
| Length of ear leaf   | 3          | 18.4                               | 19966911-123658210     | 4.400415 | 8.056              |
| Length of ear leaf   | 6          | 6.4                                | 0-3988353              | 5.037573 | 9.2922             |
| Width of ear leaf    | 1          | 9.2                                | 43765452-56573123      | 3.490645 | 6.5027             |
| Width of ear leaf    | 2          | 17.2                               | 28119790-64390401      | 5.852753 | 11.1137            |
| Width of ear leaf    | 8          | 14.9                               | 73852614-119721769     | 3.398459 | 6.3953             |
| Tassel length        | 1          | 6.3                                | 7456817-9058572        | 8.137053 | 15.194             |
| Tassel length        | 3          | 13.5                               | 9316642-18008789       | 4.529325 | 7.6388             |
| Tassel length        | 3          | 11.8                               | 204291844-211764342    | 3.364062 | 5.708              |
| Tassel length        | 3          | 8.3                                | 211950617-215929305    | 3.379695 | 5.734              |
| Tassel length        | 6          | 16.8                               | 14580546-88907571      | 5.909388 | 10.4445            |
| Tassel branch number | 1          | 10.7                               | 199631639-212579074    | 4.790648 | 7.7919             |
| Tassel branch number | 2          | 6.5                                | 36891244-44472541      | 7.728419 | 13.004             |
| Tassel branch number | 4          | 9.1                                | 188487198-200540299    | 4.995559 | 8.2013             |
| Tassel branch number | 4          | 3.5                                | 202075058-218385416    | 3.948648 | 6.5641             |
| Tassel branch number | 4          | 4.4                                | 218385416-228662377    | 3.651538 | 6.0937             |
| Tassel branch number | 8          | 7                                  | 5319559-7624018        | 4.928994 | 7.9562             |
